# Supplementary material for: Human monocytes and macrophages regulate immune tolerance via integrin αvβ8–mediated TGFβ activation
Source: PubMed Central journal article supplement (PMC6219736; doi:10.1084/jem.20171491), 2018-11-05
Supplement: JEM_20171491_sm.pdf [file JEM_20171491_sm.pdf]

## Supplemental material

Kelly et al., <https://doi.org/10.1084/jem.20171491>

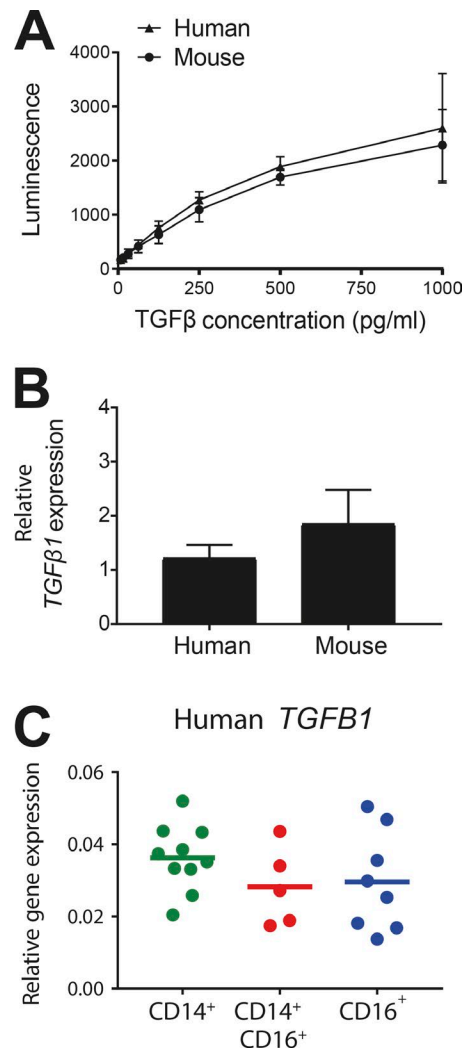

Figure S1. **Active TGFβ reporter cells respond equally to murine and human TGFβ1, and different monocyte subsets show equivalent TGFβ1 expression.** (A) Active TGFβ reporter cells (Abe et al., 1994) were cultured overnight in the presence of doses of murine or human active TGFβ1 before measurement of luciferase signal ( $n = 3$ ). (B) Human CD14<sup>+</sup> monocytes were sorted from peripheral blood, and murine Ly6C<sup>hi</sup> monocytes were sorted from spleen. *TGFβ1* expression was measured by real-time PCR in monocyte subsets, normalizing to the housekeeping gene *B2M* for human samples and *Hprt* for mouse samples. Data are representative of two independent experiments,  $n \geq 6$ . Data shown are means; error bars are SD. (C) Human monocyte subsets were sorted from peripheral blood and *TGFβ1* expression measure by real-time PCR, normalizing to the housekeeping gene *B2M*.  $n = 5-10$ .

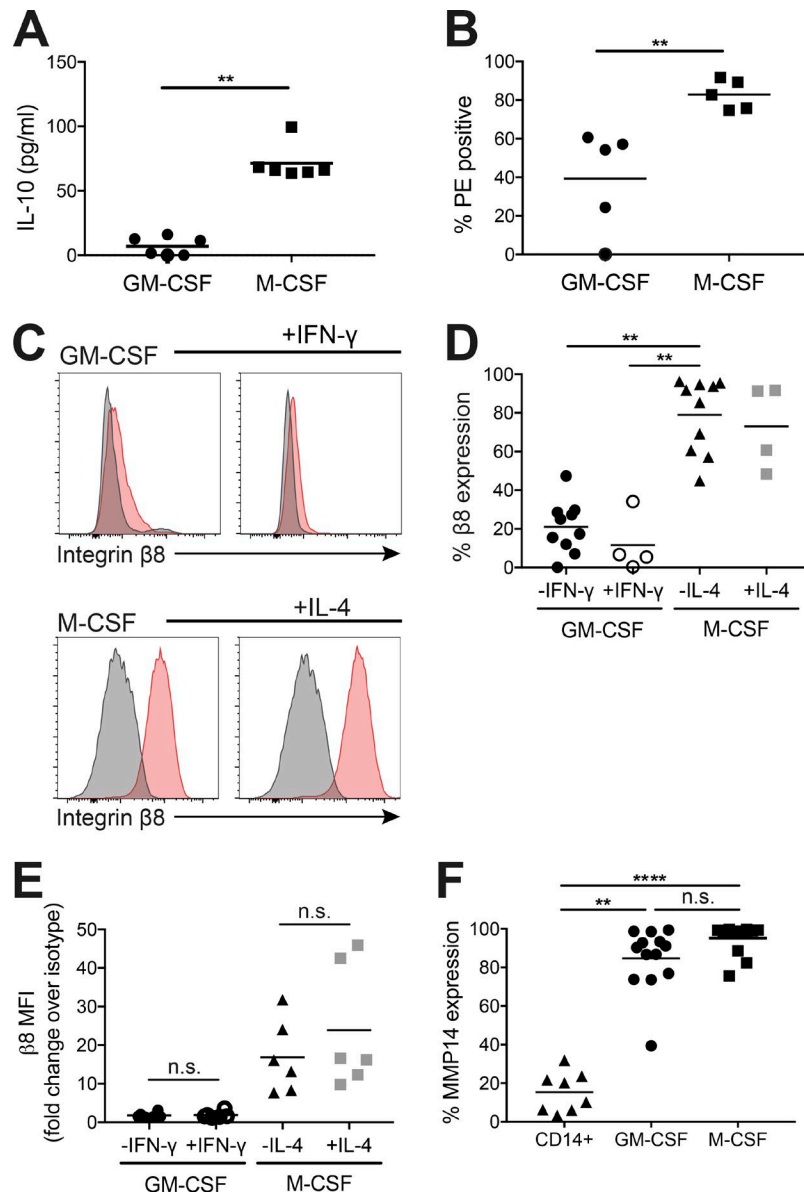

Figure S2. **Integrin  $\beta$ 8 expression is highest on M-CSF MDMs showing increased IL-10 production and phagocytic ability.** (A) IL-10 production was measured in supernatants from GM-CSF- and M-CSF-derived MDMs cultured for 6 d ( $n = 6$ ). (B) The capacity of GM-CSF- and M-CSF-derived MDMs to phagocytose PE-labeled *Escherichia coli* was compared ( $n = 5$ ). (C) Representative histograms showing integrin  $\beta$ 8 expression (red) on MDMs derived using GM-CSF<sup>+/+</sup>-IFN- $\gamma$  or M-CSF<sup>+/+</sup>-IL-4. Isotype control is shown in gray. (D and E) Graph shows cumulative data from  $n = 4$ –10 donors (D, percent expression; E, mean fluorescence intensity [MFI]). (F) Expression of MMP14 in CD14<sup>+</sup> monocytes, GM-CSF-differentiated MDMs, and M-CSF-differentiated MDMs was analyzed by flow cytometry ( $n = 8$ –12). \*\*,  $P < 0.01$ ; \*\*\*\*,  $P < 0.0001$ ; n.s., not significant; P values were calculated using Mann-Whitney (A and B) and Kruskal-Wallis with Dunn's multiple comparison post-test (D–F).

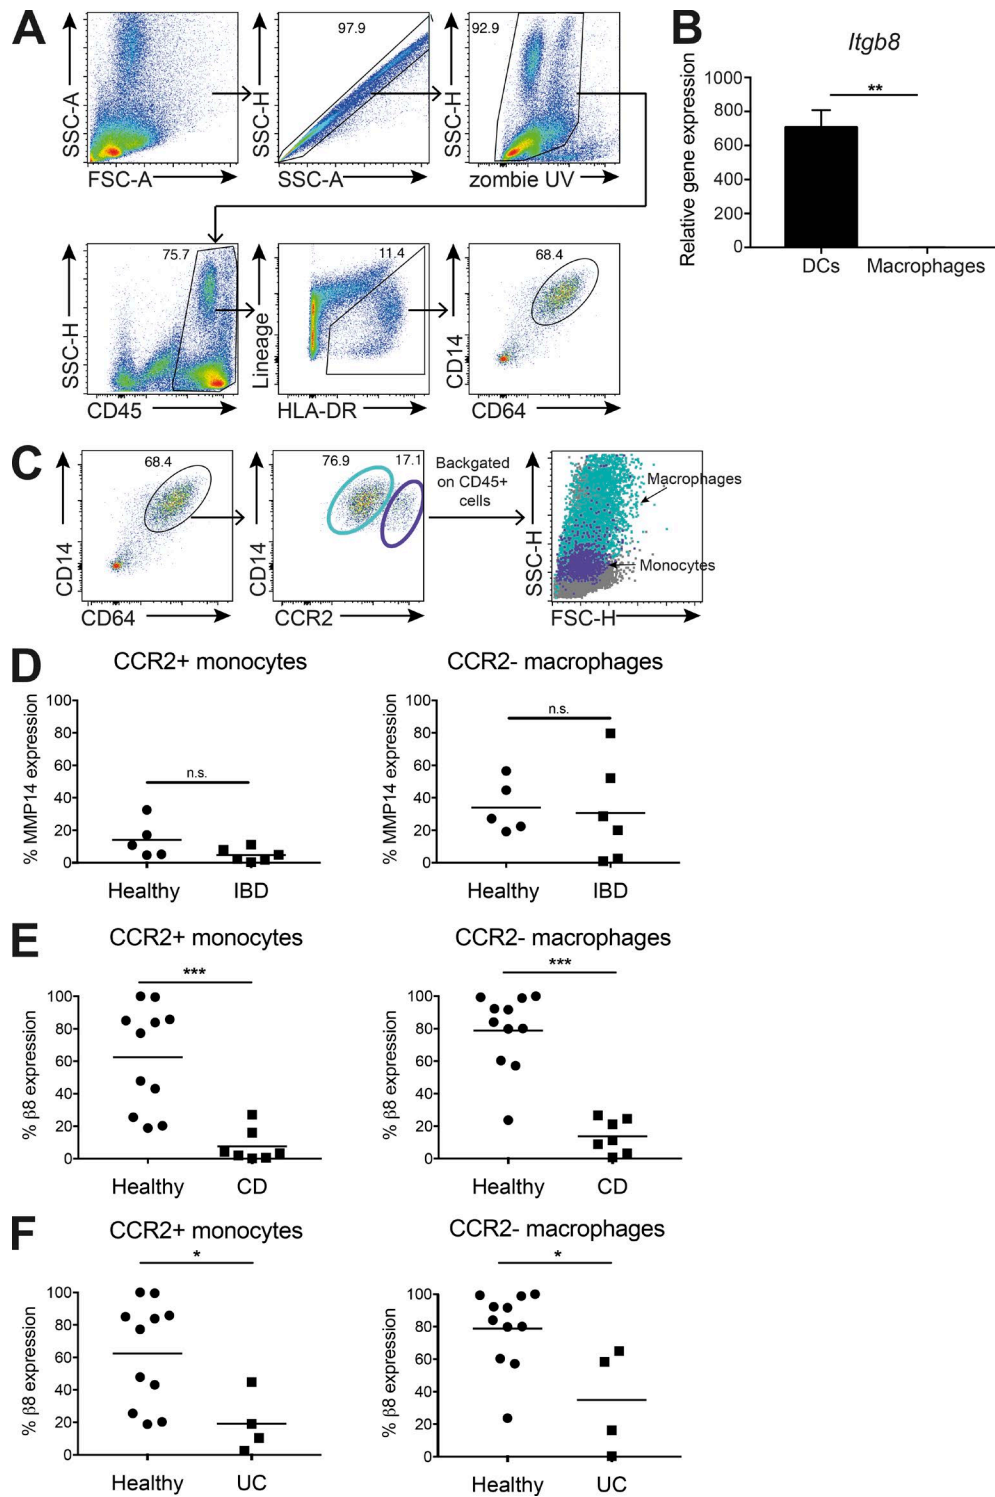

Figure S3. **Characterization of integrin  $\alpha\beta 8$  and MMP14 expression by intestinal monocyte/macrophage populations in healthy versus inflamed IBD tissue.** (A) LPMCs were isolated from healthy intestinal tissue and analyzed by flow cytometry via gating on single, live, CD45<sup>+</sup>, lineage-negative (CD3, CD15, CD19, CD20, and CD56), HLA-DR<sup>+</sup> cells within which monocyte/macrophage populations were identified by gating on CD14<sup>+</sup>CD64<sup>+</sup> cells. (B) Expression of integrin  $\beta 8$  in murine intestinal macrophages. Macrophages were isolated from the intestine as live CD45<sup>+</sup>SiglecF<sup>-</sup>Ly6G<sup>-</sup>CD64<sup>+</sup>CD11b<sup>+</sup>Ly6C<sup>-</sup>MHCII<sup>+</sup> cells, and *Itgb8* mRNA levels were measured by real-time PCR. Intestinal DCs (live CD45<sup>+</sup>B220<sup>-</sup>CD64<sup>-</sup>MHCII<sup>+</sup>CD11c<sup>+</sup>CD103<sup>+</sup>CD11b<sup>-</sup>) were used as a positive control. *n* = 3. (C) Intestinal monocyte/macrophage populations, gated as in A, were distinguished via CCR2 expression, and populations were backgated on CD45<sup>+</sup> cells to demonstrate the forward scatter (FSC) and side scatter (SSC) profile of monocytes (purple) and macrophages (blue). (D) Intestinal monocytes/macrophages, gated as described in A, then as CCR2<sup>+</sup> monocytes or CCR2<sup>-</sup> macrophages, were analyzed by flow cytometry for expression of MMP14 in healthy tissue compared with inflamed tissue from IBD patients (*n* = 5–6). (E and F) Integrin  $\beta 8$  expression was determined by flow cytometry in healthy intestinal tissue compared with inflamed tissue from (E) Crohn's disease (CD) or (F) ulcerative colitis (UC) patients (*n* = 4–11). \*, *P* < 0.05; \*\*, *P* ≤ 0.01; \*\*\*, *P* < 0.005; n.s., not significant. Statistics were calculated using Mann-Whitney tests.

Table S1 is provided as an Excel file and provides details of antibodies and reagents used for flow cytometry.

## References

Abe, M., J.G. Harpel, C.N. Metz, I. Nunes, D.J. Loskutoff, and D.B. Rifkin. 1994. An assay for transforming growth factor-beta using cells transfected with a plasminogen activator inhibitor-1 promoter-luciferase construct. *Anal. Biochem.* 216:276–284. <https://doi.org/10.1006/abio.1994.1042>
